# Supplementary material for: Synthesis, Characterization, and Antimicrobial Activity of a Novel Trisazo Dye from 3-Amino-4H-thieno[3,4-c][1]benzopyran-4-one
Source: Hindawi journal article supplement (doi:10.1155/2018/9197821), 2018-02-01
Supplement: f1 [file 9197821.f1.pdf]

# SUPPLEMENTARY MATERIALS

File : C:\HPCHEM\1\DATA  
 Operator :  
 Acquired :  
 Instrument :  
 Sample Name :  
 Misc Info :  
 Vial Number: 1

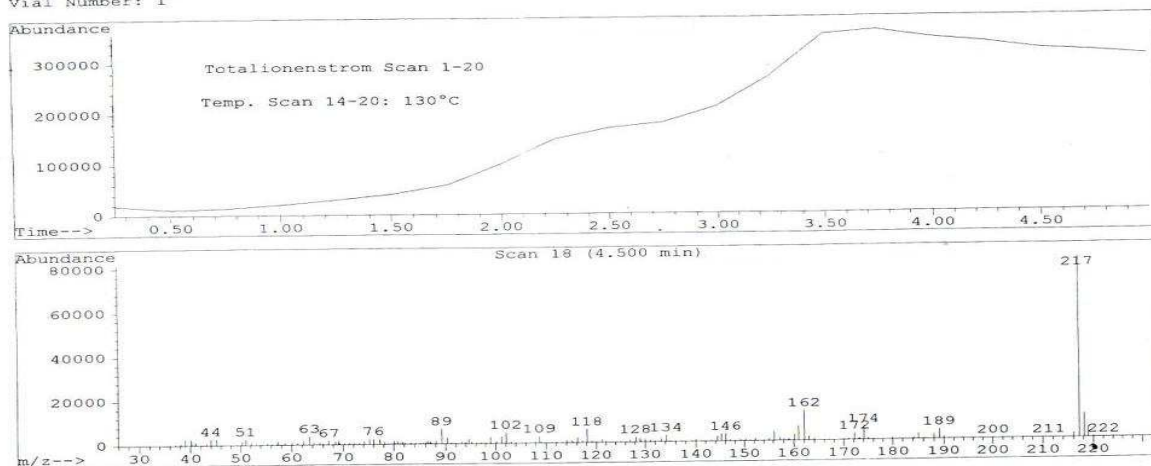

**MS Spectrum of Compound 4**

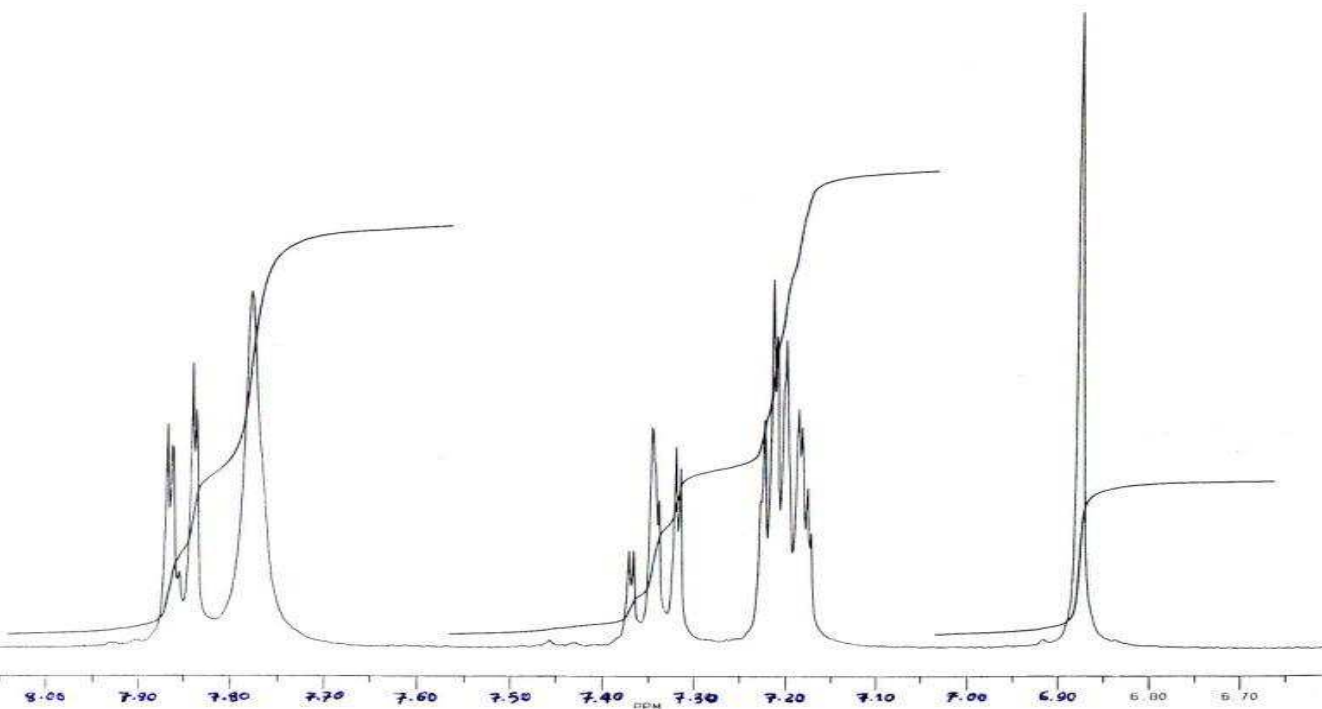

**BLUICKER**

DC48S3B.005

|        |          |
|--------|----------|
| SF     | 300.135  |
| SV     | 139.0    |
| D1     | 7815.000 |
| SI     | 32768    |
| TO     | 32768    |
| SW     | 6493.506 |
| HZ/PT  | 396      |
| DW     | 3.0      |
| RD     | 2.000    |
| AG     | 2.523    |
| RG     | 256      |
| NS     | 40       |
| TE     | 296      |
| FW     | 8200     |
| O2     | 0.0      |
| DP     | 9L PD    |
| LB     | 0.0      |
| GB     | 0.0      |
| CX     | 34.00    |
| CY     | 23.00    |
| F1     | 8.101P   |
| F2     | 6.501P   |
| HZ/CM  | 13.242   |
| PPM/CM | 0.44     |
| SR     | 4793.11  |

### <sup>1</sup>H-NMR Spectra of compound 4 (DMSO-d<sub>6</sub>, 250 MHz)

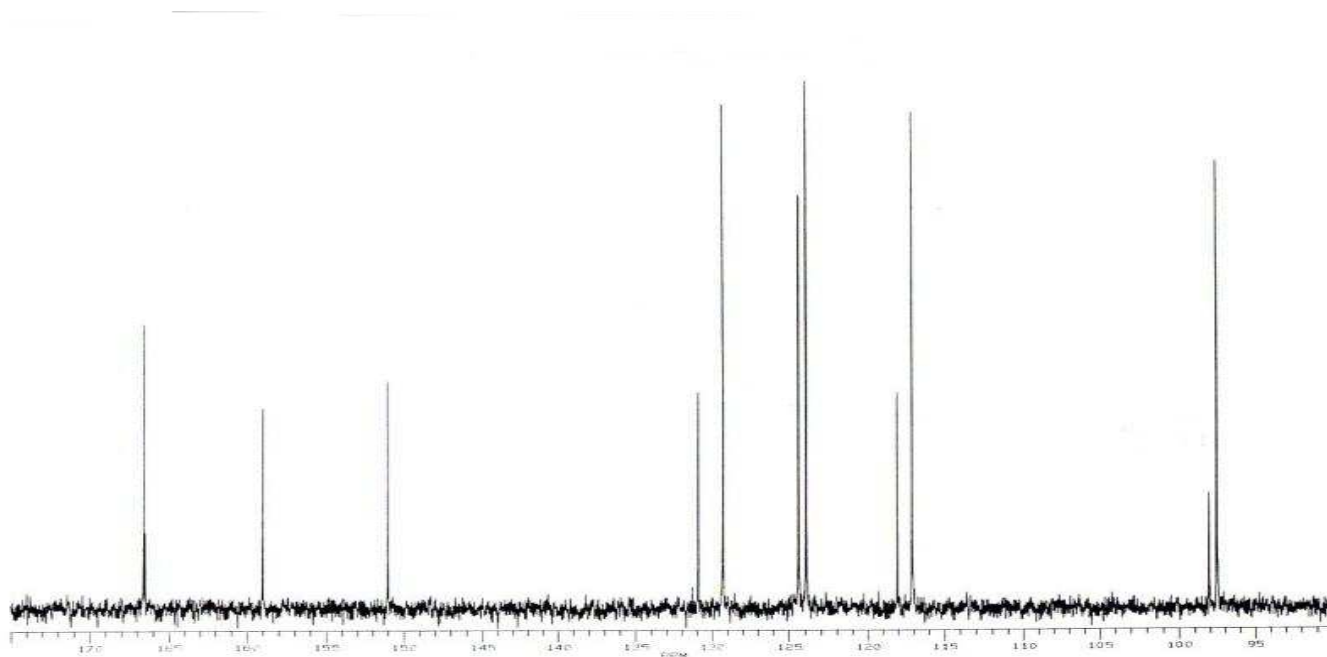

### <sup>13</sup>C-NMR Spectrum compound 4 (DMSO-d<sub>6</sub>, 62.5 MHz)

### UV-VISIBLE spectrum of compound 7

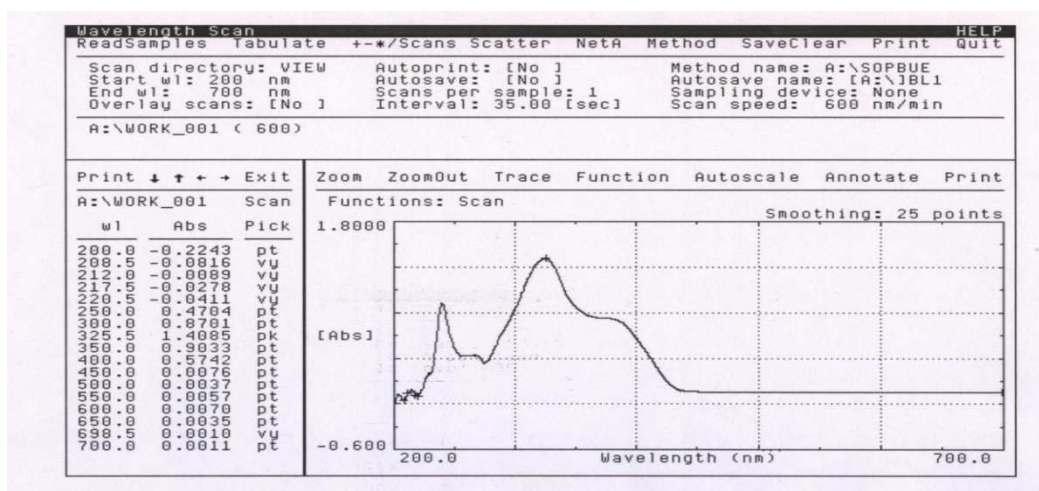

### IR spectrum of compound 7

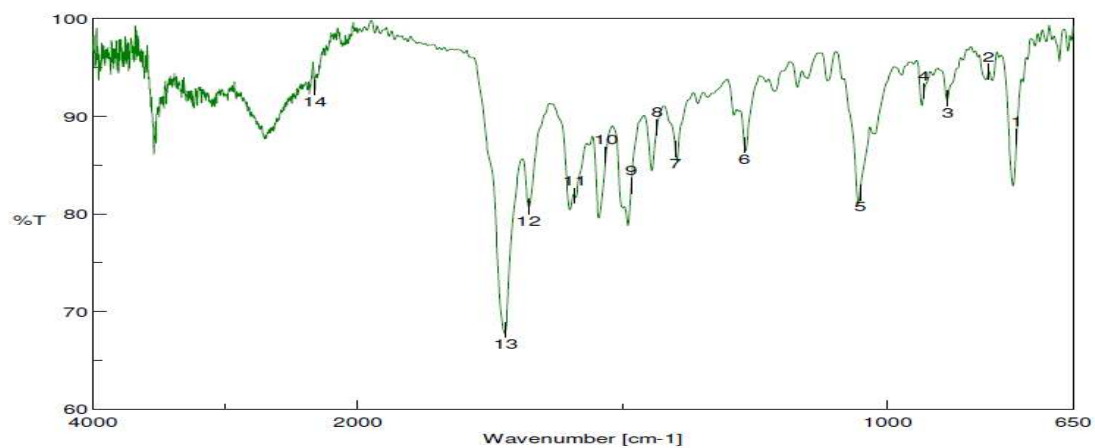

**Normal  $^1\text{H}$ - and  $^{13}\text{C}$ -NMR,  $^1\text{H}$ ,  $^1\text{H}$ -COSY and HMBC spectra of compound 62**

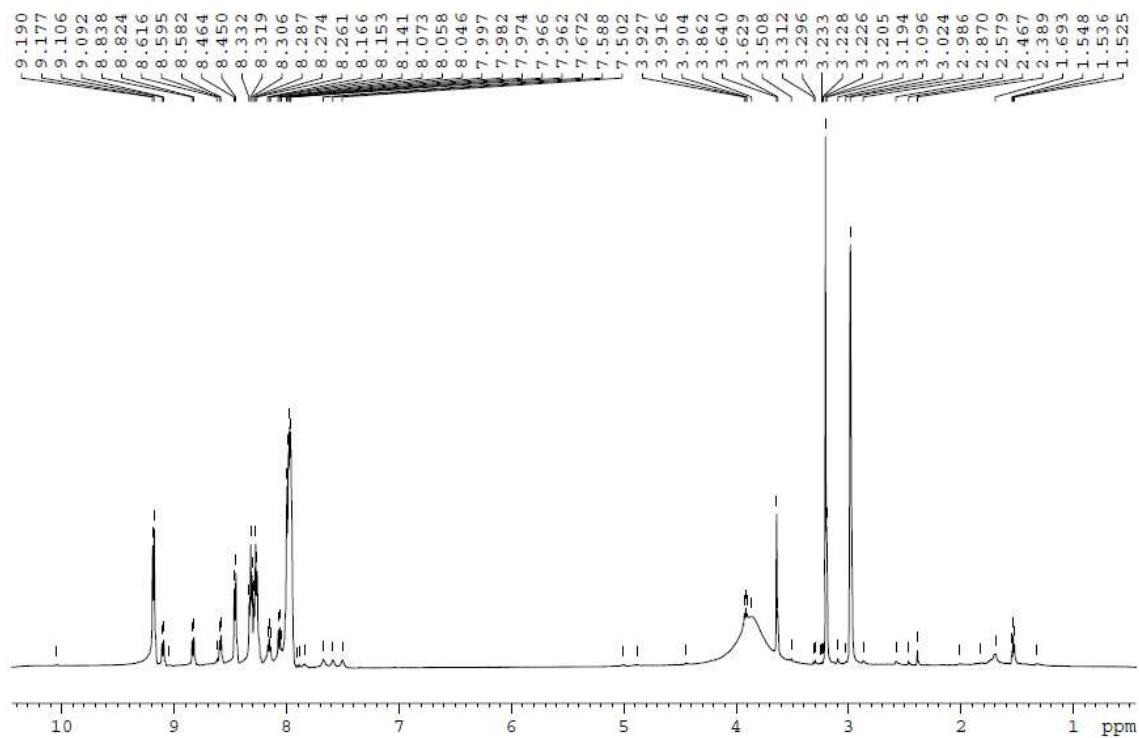

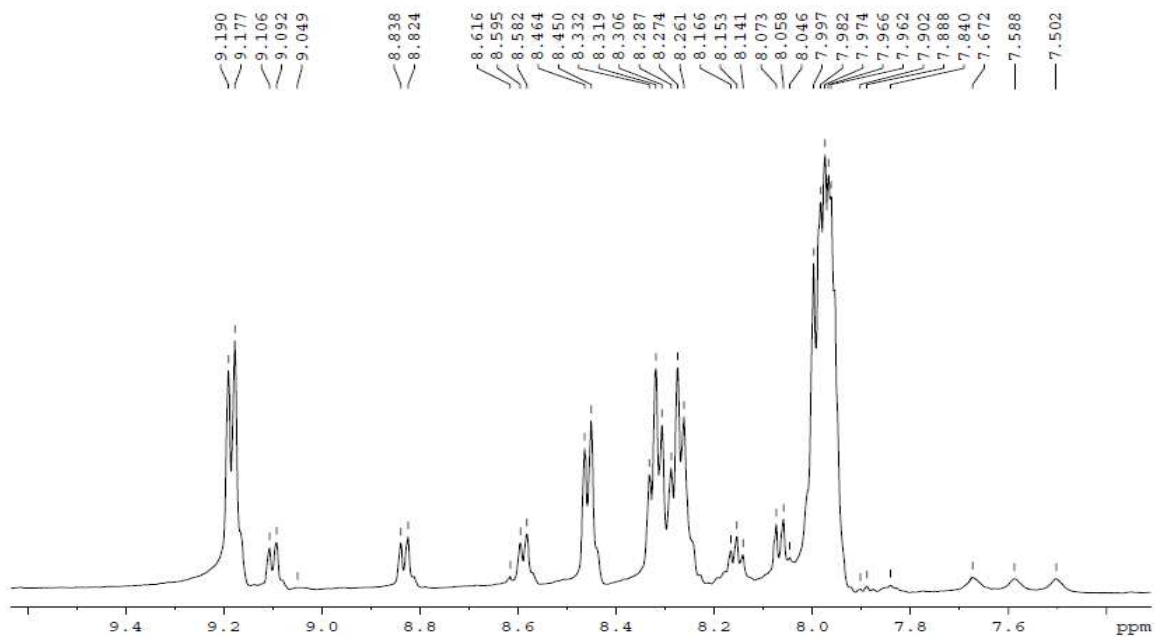

**$^1\text{H-NMR}$  Spectra of compound 7 (DMSO- $d_6$ , 250 MHz)**

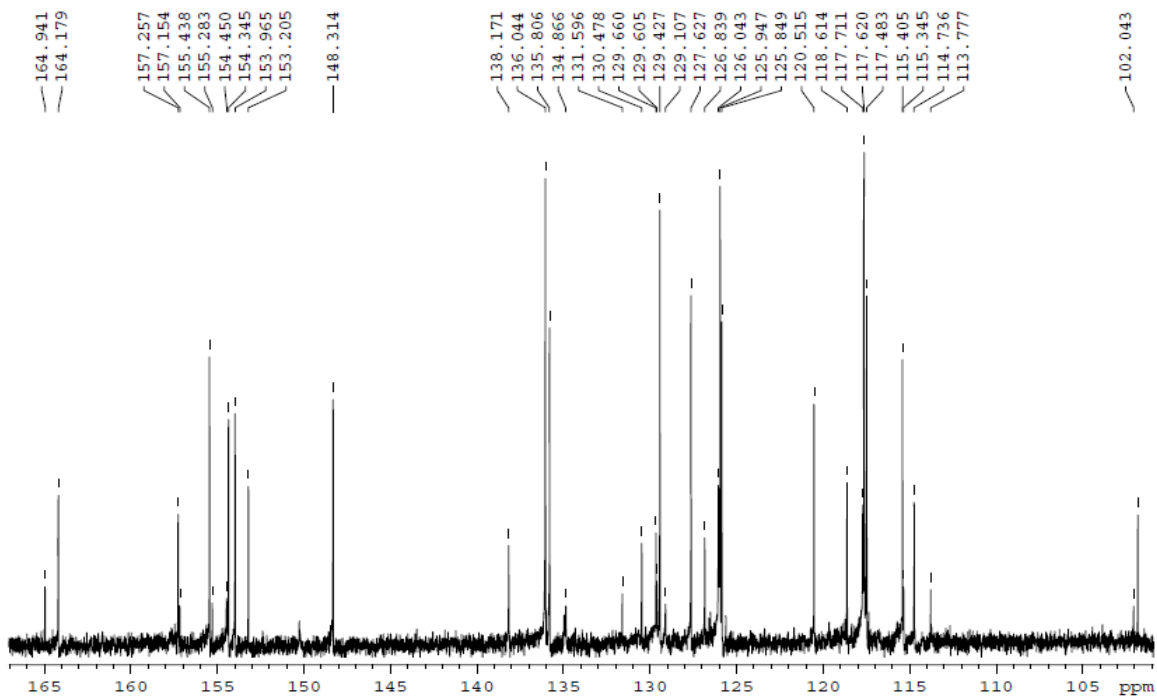

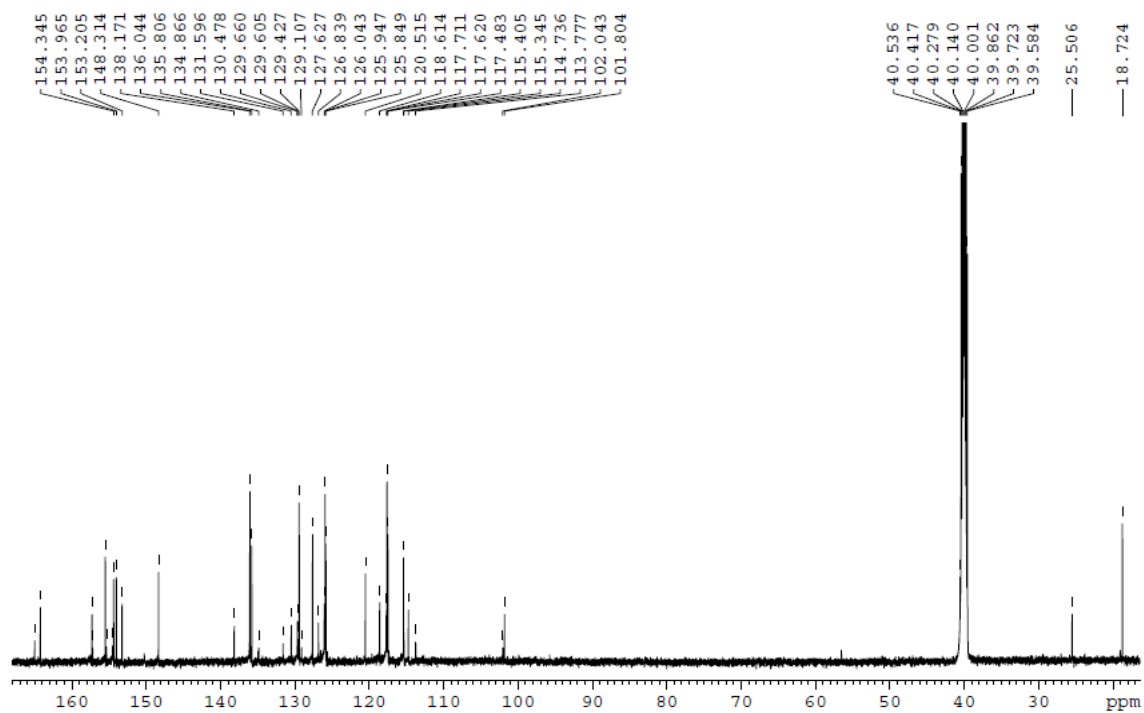

$^{13}\text{C}$ -NMR Spectrum compound 7 (DMSO- $d_6$ , 62.5 MHz)

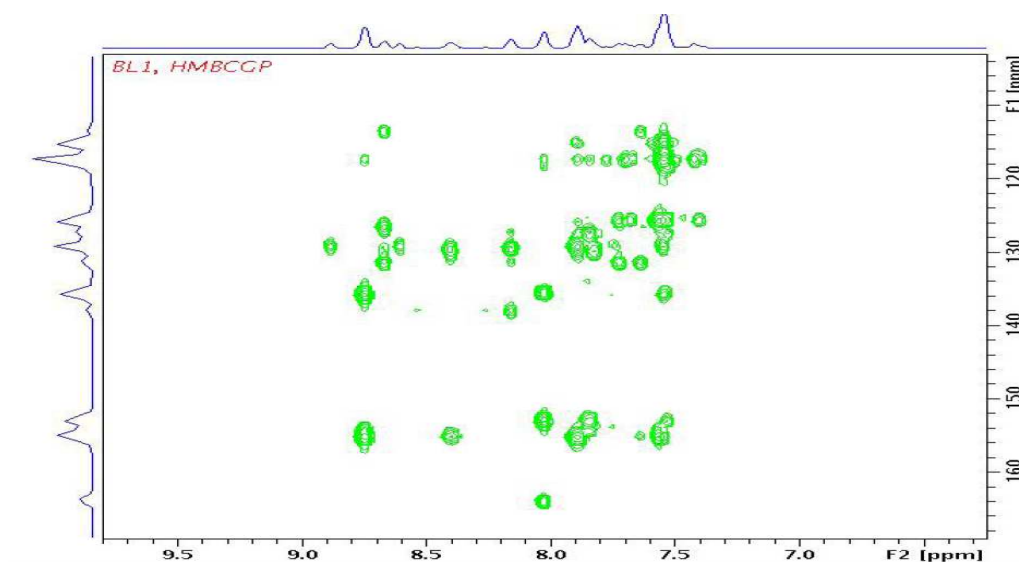

HMBC Spectrum of Compound 7 (DMSO- $d_6$ , 62.5 MHz)

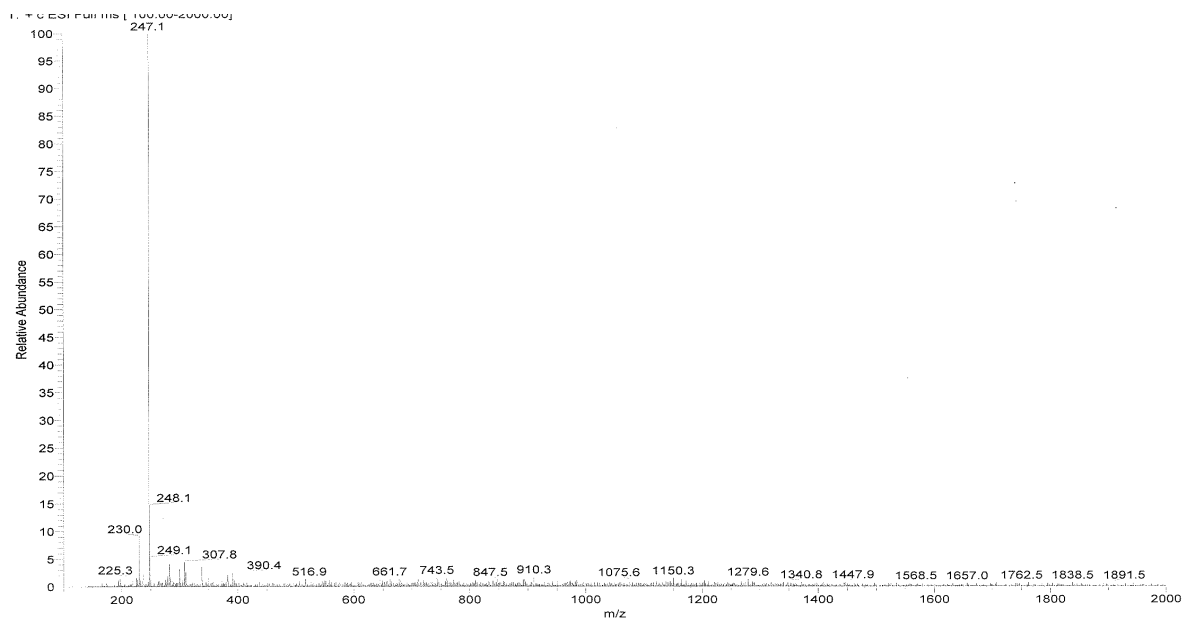

**MS Spectrum of Compound 7**
